# Supplementary material for: Digital spatial profiling of segmental outflow regions in trabecular meshwork reveals a role for ADAM15
Source: PubMed Central journal article supplement (PMC10889904; doi:10.1371/journal.pone.0298802), 2024-02-23
Supplement: pone.0298802.s004.pdf [file pone.0298802.s004.pdf]

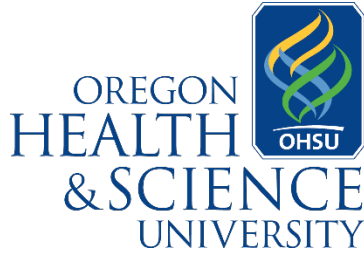

# IRB MEMO

Research Integrity Office

3181 SW Sam Jackson Park Road - L106RI  
Portland, OR 97239-3098  
(503)494-7887 irb@ohsu.edu

## NOT HUMAN RESEARCH

January 25, 2023

Dear Investigator:

On 1/25/2023, the IRB reviewed the following submission:

|                 |                                                                           |
|-----------------|---------------------------------------------------------------------------|
| Title of Study: | Thrombospondin-1 in normal and glaucomatous trabecular meshwork           |
| Investigator:   | Kate Keller                                                               |
| IRB ID:         | STUDY00025374                                                             |
| Funding:        | Name: DHHS NIH Natl Eye Inst, PPQ #: 1020808,<br>Funding Source: EY032590 |

The IRB determined that the proposed activity is not research involving human subjects. IRB review and approval is not required.

Certain changes to the research plan may affect this determination. Contact the IRB Office if your project changes and you have questions regarding the need for IRB oversight.

If this project involves the collection, use, or disclosure of Protected Health Information (PHI), you must comply with all applicable requirements under HIPAA. See the [HIPAA and Research website](#) and the [Information Privacy and Security website](#) for more information.

Sincerely,

The OHSU IRB Office
